# Supplementary material for: Thermo- and pH-Responsive Gelatin/Polyphenolic Tannin/Graphene Oxide Hydrogels for Efficient Methylene Blue Delivery
Source: MDPI journal article supplement (doi:10.3390/molecules26154529), 2021-07-27
Supplement: s1 [file s1]

## Supplementary Material

# Thermo- and pH-responsive gelatin/polyphenolic tannin/graphene oxide hydrogels for efficient methylene blue delivery

Ariel C. de Oliveira<sup>1</sup>, Paulo R. Souza<sup>1</sup>, Bruno H. Vilsinski<sup>1,8</sup>, Manuel E. G. Winkler<sup>1</sup>, Marcos L. Bruschi<sup>7</sup>, Eduardo Radovanovic<sup>4</sup>, Edvani C. Muniz<sup>1,5</sup>, Wilker Caetano<sup>6</sup>, Artur J. M. Valente<sup>3\*</sup> and Alessandro F. Martins<sup>1,2\*</sup>

<sup>1</sup> Group of polymeric materials and composites, department of chemistry, State University of Maringá (UEM), Maringá, PR 87020-900, Brazil: pg53548@uem.br (P.R.S); pg54114@uem.br (A.C.O); pg53546@uem.br (M.E.G.W)

<sup>2</sup> Laboratory of materials, macromolecules and composites, Federal University of Technology – Paraná (UTFPR), Apucarana, PR 86812-460, Brazil:afmartins@utfpr.edu.br (A.F.M)

<sup>3</sup> University of Coimbra, CQC, Department of Chemistry, 3004-535, Coimbra, Portugal: avalente@qui.uc.pt (A.J.M.V)

<sup>4</sup> Department of Chemistry, State University of Maringá, Maringá, Brazil: eradovanovic@uem.br (E.R)

<sup>5</sup> Department of Chemistry, Federal University of Piauí, Teresina, 64049-550 PI, Brazil: ecmuniz@uem.br (E.C.M)

<sup>6</sup> Núcleo de Pesquisas em Sistemas Fotodinâmicos, Chemistry Department, State University of Maringá, 87020-900 Maringá, PR, Brazil: wcaetano@uem.br (W.C)

<sup>7</sup> Laboratory of Research and Development of Drug Delivery Systems, Department of Pharmacy, State University of Maringá (UEM), 5970 Colombo Avenue, 87020-900 Maringá, PR, Brazil: mlbruschi@uem.br (M.L.B)

<sup>8</sup> Chemistry Department, Institute of Exact Sciences, Federal University of Juiz de Fora, Juiz de Fora, MG 36036-900, Brazil: bhvilsinski2@uem.br (B.H.V).

Figure S1 shows that GE/TN/GO-MB hydrogels present no significant porosity difference ( $p > 0.05$ ). However, the hydrogels loaded with MB present high porosity - between 64.54 and 77.26%. The porosity facilitates water diffusion toward the polymer matrix, favoring the solute release [1]. Indeed, porous and three-dimensional matrices can be used as drug delivery systems (DDSs) [2].

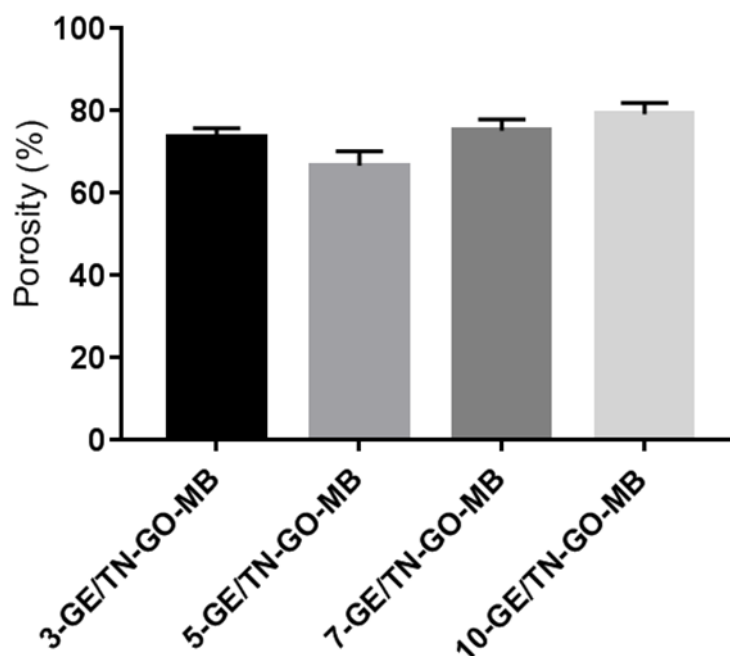

**Figure S1.** Porosity (%) of the [GE/TN/GO-MB hydrogels with different GO content (Table 1) measured at 37 °C.

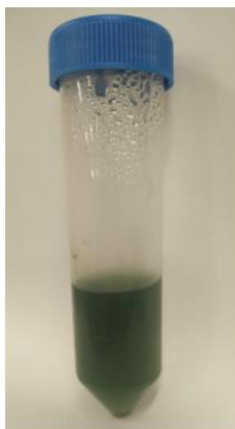

**Figure S2.** Digital images of a 10-GE/TN/GO-MB hydrogel after disintegration/dissolution (48 h) in SGF.

#### References

1. Berg, M.C., Zhai, L., Cohen, R.E., Rubner, M.F., 2006. Controlled Drug Release from Porous Polyelectrolyte Multilayers. *Biomacromolecules* 7, 357–364. <https://doi.org/10.1021/bm050174e>
2. Spizzirri, U.G., Cirillo, G. (Eds.), 2017. *Functional Hydrogels in Drug Delivery: Key Features and Future Perspectives*, 1st ed. CRC Press, Boca Raton, FL : CRC Press/ Taylor & Francis Group, 2017. <https://doi.org/10.4324/9781315152271>
